# Supplementary material
Source: PubMed Central journal article supplement (PMC4138201)
Supplement: supp_jlb.2AB0314-145R_jlb.2AB0314-145RSuppData.pdf [file supp_jlb.2AB0314-145R_jlb.2AB0314-145RSuppData.pdf]

**Table S1. RT-PCR primer pairs**

|                   |                                                             |
|-------------------|-------------------------------------------------------------|
| <i>Cebpa</i>      | F: CGGTGCGCAAGAGCCGAGAT<br>R: CCCGCAGCGTGTCCAGTTCA          |
| <i>Sfpi1/Pu.1</i> | F: CCTTCGTGGGCAGCGATGGA<br>R: TGTAGCTGCGGGGGCTGCAC          |
| <i>Runx1</i>      | F: CACCGTCATGGCAGGCAAC<br>R: GGTGATGGTCAGAGTGAAGC           |
| <i>Ets1</i>       | F: AGCCGACTCTCACCATCATC<br>R: CAAGGCTTGGGACATCATT           |
| <i>Klf1</i>       | F: CTTTGGCACCTAAGAGGCAG<br>R: CAGGAGCAGGCATAAGGC            |
| <i>Tal1/Scf</i>   | F: AACACAACCGGGTGAAGAG<br>R: CATTACATTCTGCTGCCTC            |
| <i>cMyb</i>       | F: GAATCTGGAATTGTGGCTGAG<br>R: TTTCCCGATTTCTCAGTTGG         |
| <i>Erg</i>        | F: CCGAAGCTACGCAAAGAATTAC<br>R: TTGGACTGAGGGGTGAGG          |
| <i>Fli1</i>       | F: CGCCTACAACACAGAAGTGC<br>R: CGTGAGGACTGGTCTGTATGG         |
| <i>Gata2</i>      | F: CACAAGATGAATGGACAGAACC<br>R: TTGTCGTCTGACAATTTGCAC       |
| <i>Gata1</i>      | F: CAGAACCGGCCTCTCATC<br>R: TCCGCCAGAGTGTTGTAGTG            |
| <i>HoxA9</i>      | F: AGAAAAACAACCCAGCGAAG<br>R: GGGTTATTGGGATCGATGG           |
| <i>hCD4</i>       | F: AGAAGAAGAGCATAACAATTCCACTG<br>R: ATTCAGCTTGGATGGACCTTTAG |
| <i>mS16</i>       | F: CTTGGAGGCTTCATCCACAT<br>R: ATATTCGGGTCCGTGTGAAG          |
